# Supplementary material for: Machine learning predicts the functional composition of the protein corona and the cellular recognition of nanoparticles
Source: PubMed Central journal article supplement — Proc Natl Acad Sci U S A. 2020 Apr 24;117(19):10492–9. doi: 10.1073/pnas.1919755117 (PMC7229677; doi:10.1073/pnas.1919755117), 2020-04-24
Supplement: pnas.1919755117.sapp.pdf [file pnas.1919755117.sapp.pdf]

**Machine Learning Predicts the Functional Composition of the Protein Corona  
and the Cellular Recognition of Nanoparticles**

Zhan Ban<sup>#</sup>, Peng Yuan<sup>#</sup>, Fubo Yu, Ting Peng, Qixing Zhou, Xiangang Hu<sup>\*</sup>

Key Laboratory of Pollution Processes and Environmental Criteria (Ministry of Education)/Tianjin Key Laboratory of Environmental Remediation and Pollution Control, College of Environmental Science and Engineering, Nankai University, Tianjin 300350, China

*# Zhan Ban and Peng Yuan contributed equally to this paper.*

*\* Corresponding author: Xiangang Hu, [huxiangang@nankai.edu.cn](mailto:huxiangang@nankai.edu.cn)*

Fax: 0086-022-23507800

Tel.: 0086-022-23507800

## METHODS AND EXPERIMENTS

### Data Extraction

The literature references were obtained from the PubMed, Scopus and ISI Web of Knowledge databases on November 26, 2017, with the following search criteria: (nanoparticle[Title/Abstract] OR nanomaterial[Title/Abstract] OR "quantum dot"[Title/Abstract] OR nanosphere[Title/Abstract] OR fullerene[Title/Abstract] OR nanodiamond[Title/Abstract] OR nanowire[Title/Abstract] OR nanotube[Title/Abstract] OR MWCNT[Title/Abstract] OR nanofiber[Title/Abstract] OR graphene[Title/Abstract] OR nanocrystal[Title/Abstract] OR nanopowder[Title/Abstract] OR nanosheet[Title/Abstract] OR "metal organic framework"[Title/Abstract] OR MOF[Title/Abstract] OR nanocapsule[Title/Abstract] OR dendrimer[Title/Abstract] OR nanocomposite[Title/Abstract]) AND (protein[Title/Abstract] AND corona[Title/Abstract]). There were no search limitations on the publication date or language. With this extensive search, 2634 publications were obtained, including 1065 duplications with the same title, authors and publication date. A total of 719 studies were removed because of a lack of relevance to the topic of the work. Finally, 56 papers<sup>1-56</sup> satisfied the following selection criteria and were selected for further analyses: (i) the full text was available online; (ii) the topic was the protein corona of nanoparticles (NPs); (iii) the protein corona was formed in blood, serum, plasma or cell culture medium; (iv) the paper

provided information about the physicochemical properties of the NPs (e.g., the core/shell, shape, and surface ligands or other modifications); (v) the paper provided information about protein corona formation in healthy plasma, serum, blood or cell culture medium (e.g., exposure time, plasma concentration and species of the plasma or blood); (vi) the paper provided information about the isolation of the protein corona from NPs by centrifugal capture (e.g., centrifugation time and relative centrifugation force); (vii) the paper estimated the relative protein abundance (RPA) with normalized spectral counts (NSCs) of proteins in the protein corona by the following equation:

$$MWNSC_k = \frac{(NSC/MW)_k}{\sum_{i=1}^n (NSC/MW)_i} \times 100\%$$

where  $MWNSC_k$  is the percentage molecular weight normalized by the NSC for protein  $k$ , and the molecular weight (MW) is in kDa; (viii) the paper listed the protein names and the RPA (or spectral count or NSC) of each protein with an RPA greater than 1%. This work extracted 21 important factors related to NP properties (NP type, NP core, surface modification, modification type, size measured by transmission electron microscopy (TEM) ( $size_{TEM}$ ), size measured by dynamic light scattering (DLS) ( $size_{DLS}$ ), zeta potential, polydispersity index (PDI, NP shape, dispersion medium, dispersion medium pH), corona formation (protein source, incubation culture, incubation plasma concentration, incubation NP concentration, incubation time, incubation temperature), and corona isolation (centrifugation speed,

centrifugation time, centrifugation temperature and centrifugation repetitions). The DLS technique is well known to struggle with providing meaningful data on aggregated particles, and  $size_{TEM}$  instead of  $size_{DLS}$  was used in corona composition prediction models. To control the heterogeneity and reveal the adsorption patterns of numerous proteins on various NPs, the following treatment methods were applied to the dataset.

### **Special Data Treatment**

The present work calculated the missed RPA values of proteins in the literature publications using equation 1. The information (e.g., protein description, protein entry, length, MW, keywords and sequence analysis) on individual proteins (with RPA greater than 1%) was extracted from UniProt.org. The theoretical isoelectric point (pI) of proteins was calculated on web.expasy.org, and the grand average of hydropathicity (GRAVY) score, aliphatic index and cysteine content of proteins were calculated using the ProtParam tool at <https://web.expasy.org/protparam/>. To compare the protein adsorption of various NPs from different studies, the analysis transformed the proteins from different organisms (e.g., rat, mouse and cattle) to humans. Finally, 593 individual proteins and 652 data pieces were collected for individual prediction models. To further evaluate the attachment mechanism of proteins on NPs, this work classified the overall proteins in terms of their protein properties (e.g., MW, pI, length and GRAVY). According to the molecular properties and biological function of

proteins identified from the UniProt database, the functional composition was classified as immunity proteins, apolipoproteins, complement proteins, coagulation proteins, clusterin and other proteins. Because some studies did not list the RPA values of all proteins, the analysis selected the data on proteins with an overall RPA value of more than 70% and normalized the RPA values of each class according to the overall RPA value of each data point. Finally, 567 data points and 73 protein classes were collected for composition prediction models.

For the selected factors affecting the components of the protein corona, the present work converted special data points into common ones that could be made available as training input for the machine learning model (random forest, RF). For the NP modifications, the analysis combined some modifications as listed in Table S1 because the RF model could not handle categorical factors with more than 50 categories. The missing values for NP shape were treated as spheres. For other NP shapes (e.g., tube and sheet), the widths and thicknesses were recorded. The “overnight” incubation time and the indoor temperature were set to 12 h and 25°C, respectively. Regarding other factors with a small number of missing values, the present work replaced the missing value with the most frequent value (e.g., phosphate-buffered saline (PBS) for solution and water for other solution cultures) for categorical factors and with the median value (e.g., 20 min for centrifugation time and 1 h for incubation time) for numeric factors.

### **Tenfold Cross-validation Analysis**

Given the high heterogeneity of complex protein coronas with numerous factors and the limited datasets for the analysis, tenfold cross-validation was applied to further avoid overfitting. The original dataset was randomly partitioned into ten folds. Nine folds were utilized to train the model as the training set, and the remaining one-fold model was evaluated as the test set. The average  $R^2$  and RMSE were applied to measure model performance.

### **Factor Selection**

To select the key factors determining the various proteins on NPs, the intersections of key factors selected by variable importance were regarded as key factors determining the NP-protein interaction patterns. According to variable importance from models containing overall data pieces and factors, ten significant and independent factors (i.e., NP without modifications, modification,  $size_{TEM}$ , zeta potential, incubating protein source, incubating plasma concentration, incubating NP concentration, centrifugation speed, centrifugation time and centrifugation temperature) were identified for further analyses.

### **Protein identification by Mass Spectrometry**

The protein corona was analyzed using LC-MS/MS (Orbitrap Fusion and Easy-nLC 1000 system, Thermo Fisher Scientific, USA). Prior to analysis, the protein corona was diluted in solution A (0.1% formic acid in water), and the peptide fragments were

loaded on a reversed-phase column (precolumn: packing material size, 3  $\mu\text{m}$ ; aperture, 120  $\text{\AA}$ ; 2 cm $\times$ 100  $\mu\text{m}$  ID; analytical column: packing material size, 1.9  $\mu\text{m}$ ; aperture, 120  $\text{\AA}$ ; 15 cm $\times$ 150  $\mu\text{m}$  ID) for preparation with a 600 nL/min flow rate and 60 min elution. The Orbitrap full scan was conducted in data-dependent acquisition mode with the following parameters: scanned area, 300-1400; scanning resolution, 120000; automatic gain control (AGC) targets,  $5\times 10^5$  ions; max injection time, 100 ms.

Coupled MS with high-energy collision dissociation was employed to break parent ions. Then, the broken ions were detected in an ion trap with the following parameters: first mass, 120; resolution rate, 30000; AGC targets,  $5\times 10^3$  ions; max injection time, 35 ms; and exclusion duration, 18 s.

The raw data from LC-MS/MS were searched in the UniProt database (2019-02) using Proteome Discoverer 2.1 (Thermo Scientific). To obtain quantitative and qualitative information on proteins and peptides, the search parameters were set as follows: mass deviation of parent ions, 20 ppm; mass deviation of fragment ions in coupled MS, 0.5 Da; the number of restriction enzyme cutting sites of trypsin, 2; variable modifications, protein acetyl (protein N-term), oxidation, and carbamidomethyl; and false discovery rate of peptides, 1% by the decoy database.

Over 1000 proteins were detected in each sample. The normalized spectral counts of each protein were utilized to measure the RPA values of the identified proteins.

### **Cytokine Analysis**

The murine macrophage cell line RAW264.7, was obtained from Shanghai Cell Bank of the Type Culture Collection of China. Cells were grown in Dulbecco's modified Eagle medium (DMEM, high glucose, Ding Guo, China) supplemented with 10% fetal bovine serum (FBS, AusGeneX, Australia) and a final concentration of 100 units/mL penicillin-streptomycin in a humidified incubator with 5% CO<sub>2</sub> at 37 °C. To analyze cytokine secretion by macrophages (RAW264.7), dendritic cell line (DC2.4) and human leukemic cell line (THP-1), cells were seeded in 96-well plates (1.5×10<sup>4</sup> cells/well) for 12 h. NP dispersions (Fe<sub>3</sub>O<sub>4</sub>, Fe<sub>3</sub>O<sub>4</sub>-CIT, Ag, TiO<sub>2</sub>, Au-NH<sub>2</sub> and Au-COOH NPs) at 25 mg/L with or without protein coronas were cultured with cells in serum-free medium. After 6 h of exposure, the supernatant was collected, and the cytokines (TNF-α and IL-6) were measured using ELISA kits (Dakewe, Shenzhen, China). To analyze the immune effect of the corona, the cells were cultured with NPs and seeded on 96-well plates (1.5×10<sup>4</sup> cells/well) for 12 h. After 6 h of exposure, the supernatants were removed, and the cells were washed with PBS. Then, cells were treated with LPS (20 ng/mL) for another 6 h. Finally, the supernatants were collected, and the cytokines were detected with ELISA kits.

To measure the cellular recognition effects of the protein corona on cellular uptake, IL-6 secretion and TNF-α secretion, the following formula was applied to calculate the recognition index of the protein corona; the physiological level of iron as the control was detected. The concentrations of Fe<sub>3</sub>O<sub>4</sub> NP uptake were much higher



(approximately 2-6-fold higher) than the physiological level of iron, and the physiological level of iron was subtracted during the calculation ( $n \geq 3$ ):

$$recognition\ index = \frac{R_{PC} - R_{NO}}{R_{NO}} \times 100\%$$

where the recognition index represents normalized changes in cellular uptake or cytokine release due to the presence of the corona;  $R_{PC}$  and  $R_{NO}$  represent the measured cellular uptake or cytokine release with and without the protein corona, respectively.

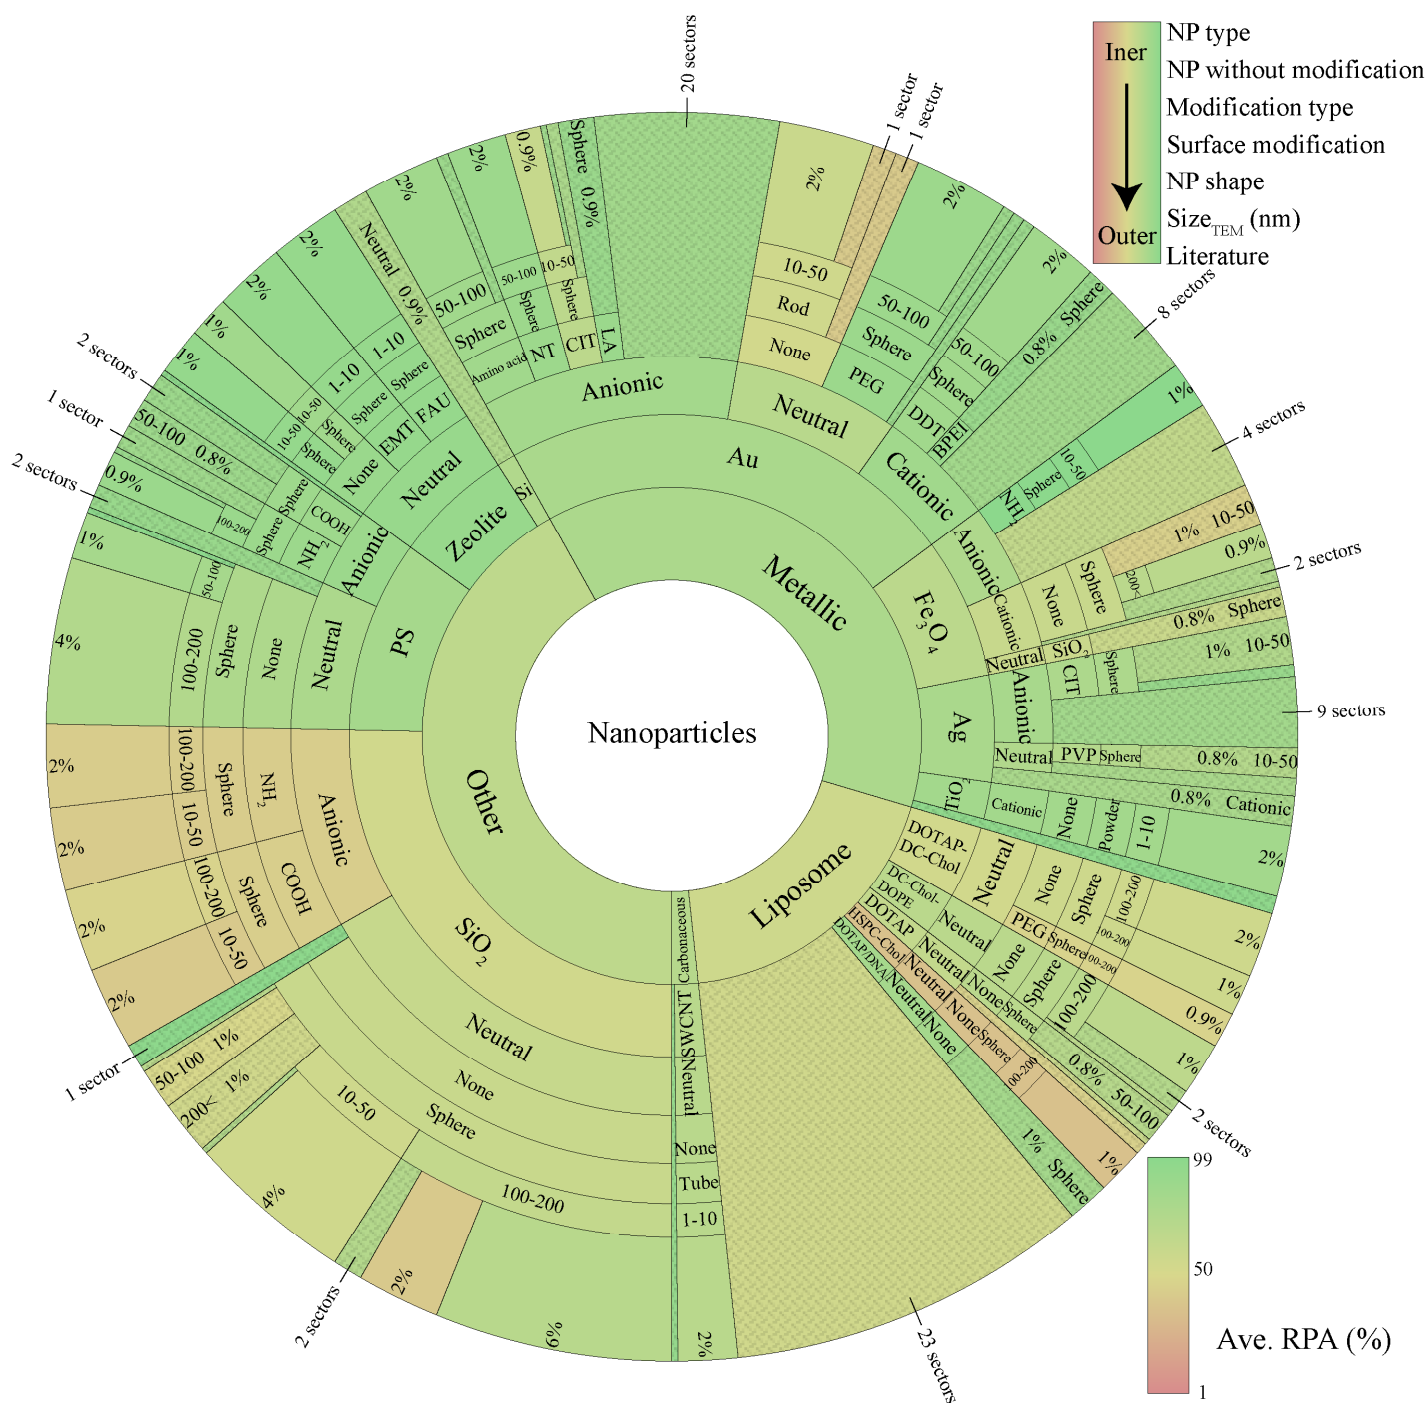

Figure S1. Distributions of 652 mined data items. The Krona chart subdivides each sector into smaller sectors according to the data components. The values of the outermost sectors are the proportions of NPs with a given characteristic among the overall 652 data items. The subgroups with small angles are presented by collapsed

sectors. RPA, relative protein abundance; PS, polystyrene; SWCNT, single-walled carbon nanotube; DOTAP, 1,2-dioleoyl-3-trimethylammonium-propane; HSPC, hydrogenated soy phosphatidylcholine; Chol, cholesterol; DC, 3 $\beta$ -[N-(N',N'-dimethylaminoethane)-carbamoyl]; DOPE, dioleoylphosphatidylethanolamine. The abbreviations of the modifications are listed in Table S1.

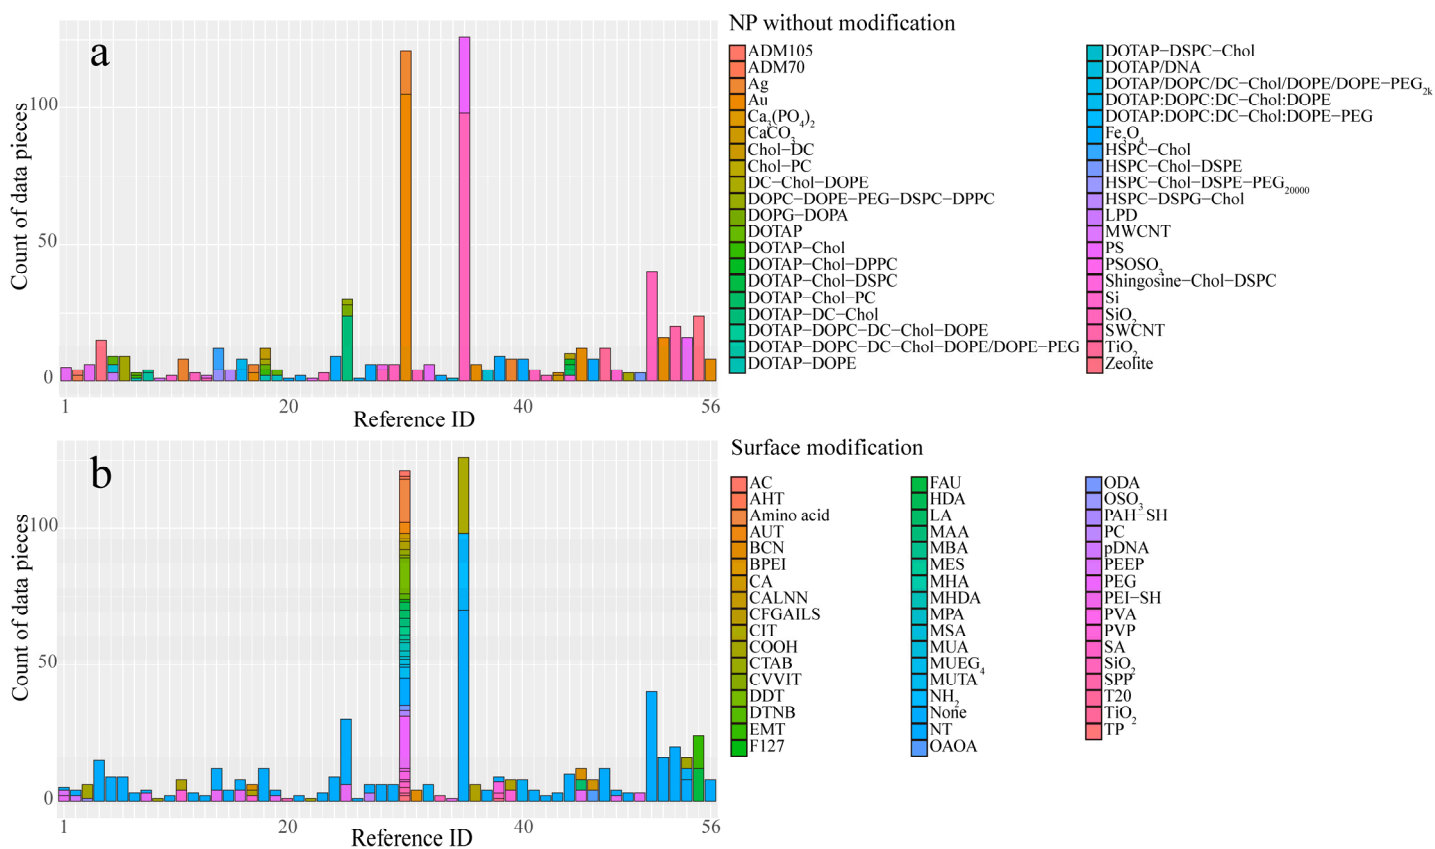

Figure S2. Distribution of data points on NP cores and surface modifications extracted from the literature. The abbreviations of the modifications are listed in Table S1. The references are listed as # 1-56.

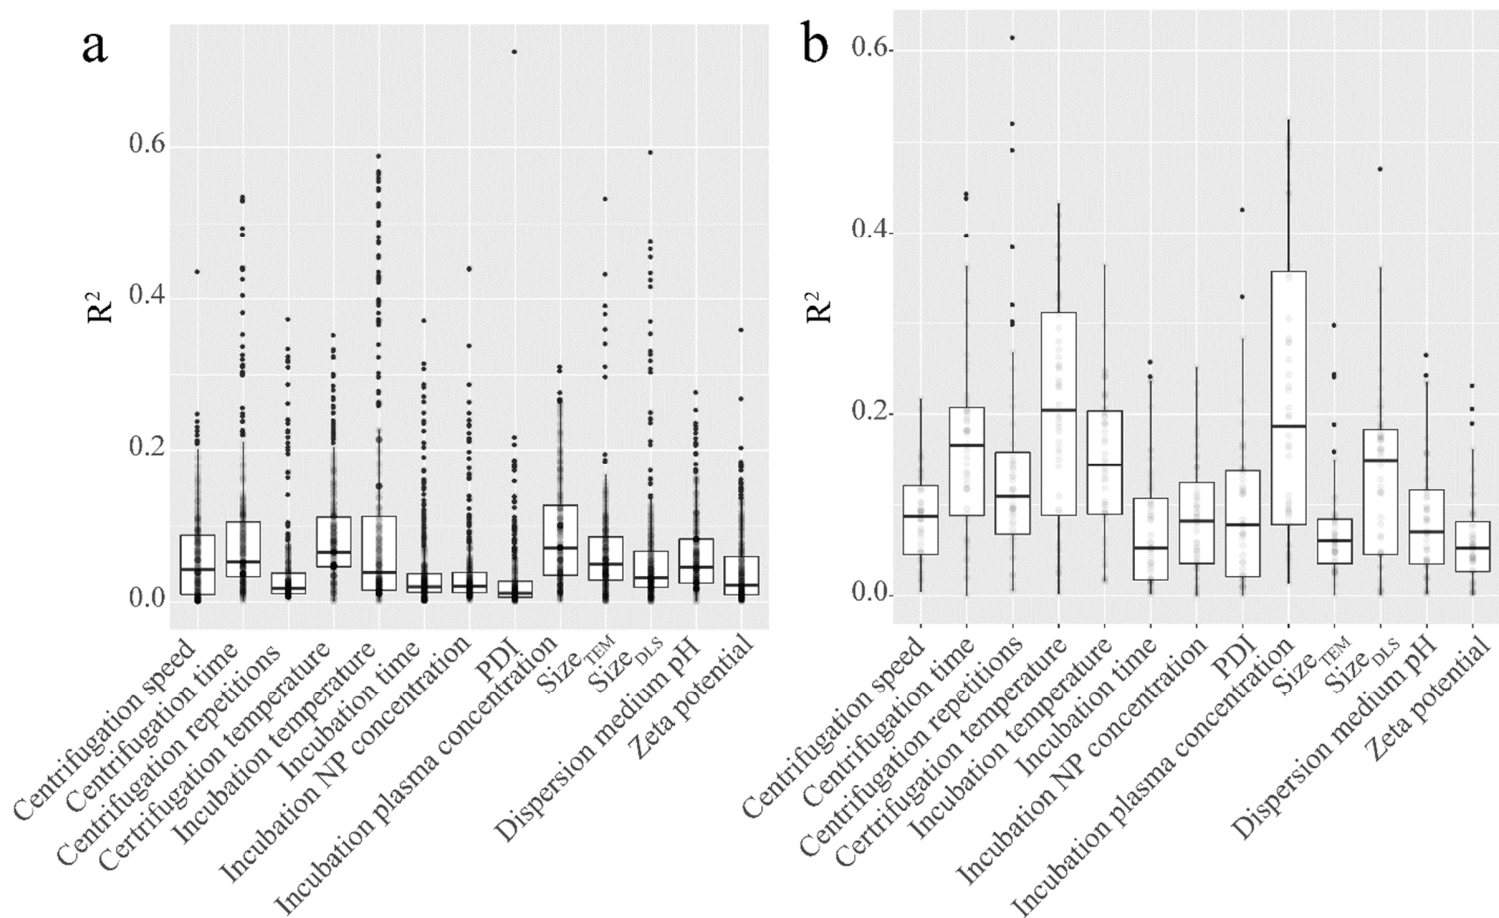

Figure S3. Performance of the linear regression model to reveal the relationships between quantitative factors and protein corona composition. a, Linear regression model based on 593 individuals; b, linear regression model based on 73 protein classes. The analysis estimated the model performance from the correlation coefficient ( $R^2$ ) between the observations and the predictions. PDI, polydispersity index.



models. The normalized percentages of the increase in mean square error (a) and the normalized increase in node purity (b) were employed to measure the variable importance.

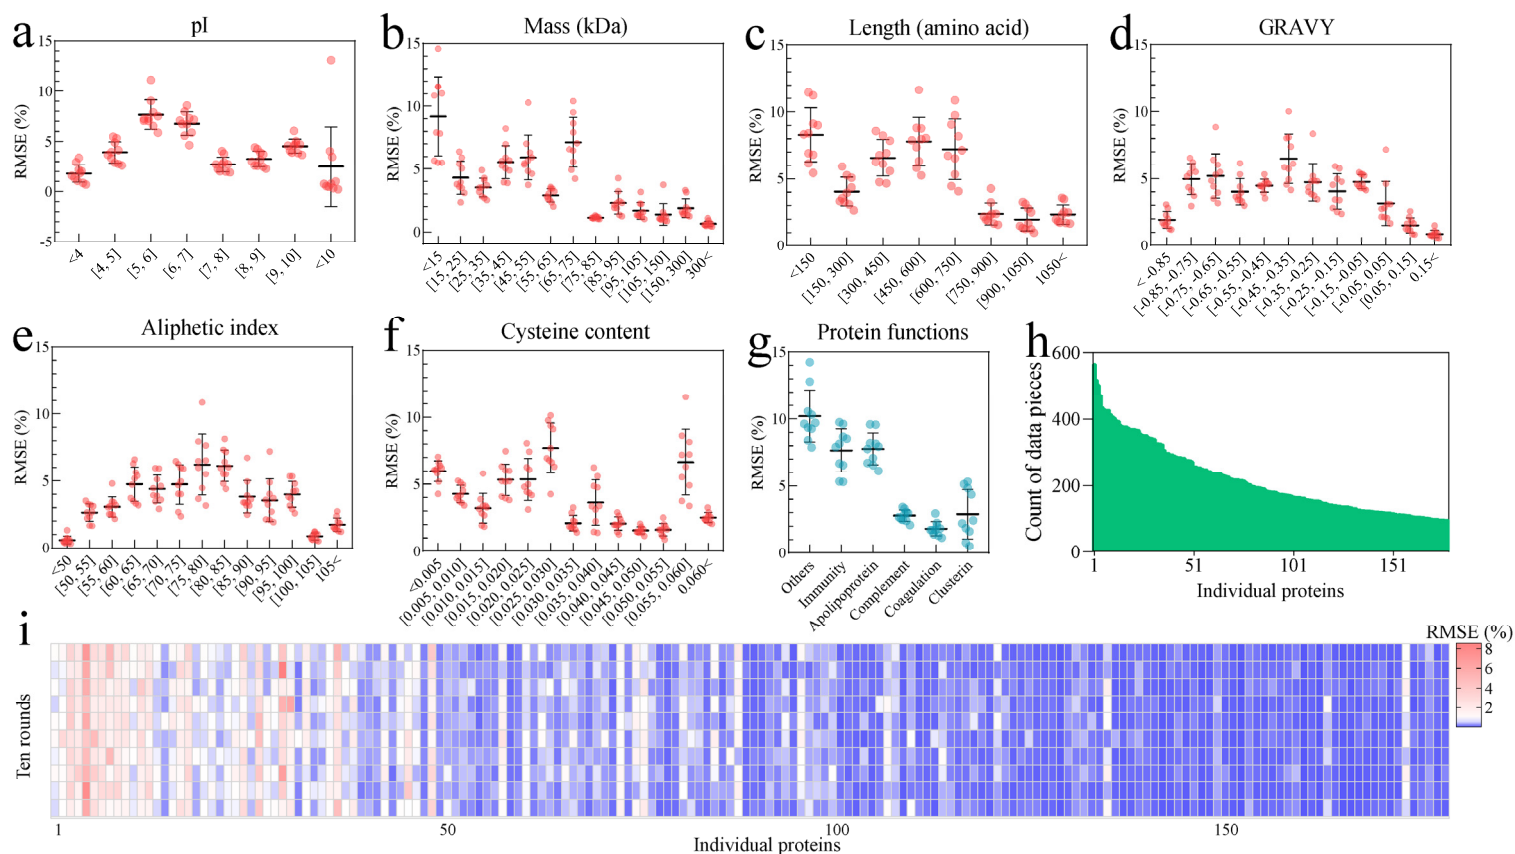

Figure S5. Model performance on functional, physicochemical and individual compositions of protein corona predictions. A tenfold cross-validation was used to evaluate the prediction accuracy without overfitting. More information about individual proteins is shown in the supporting dataset.

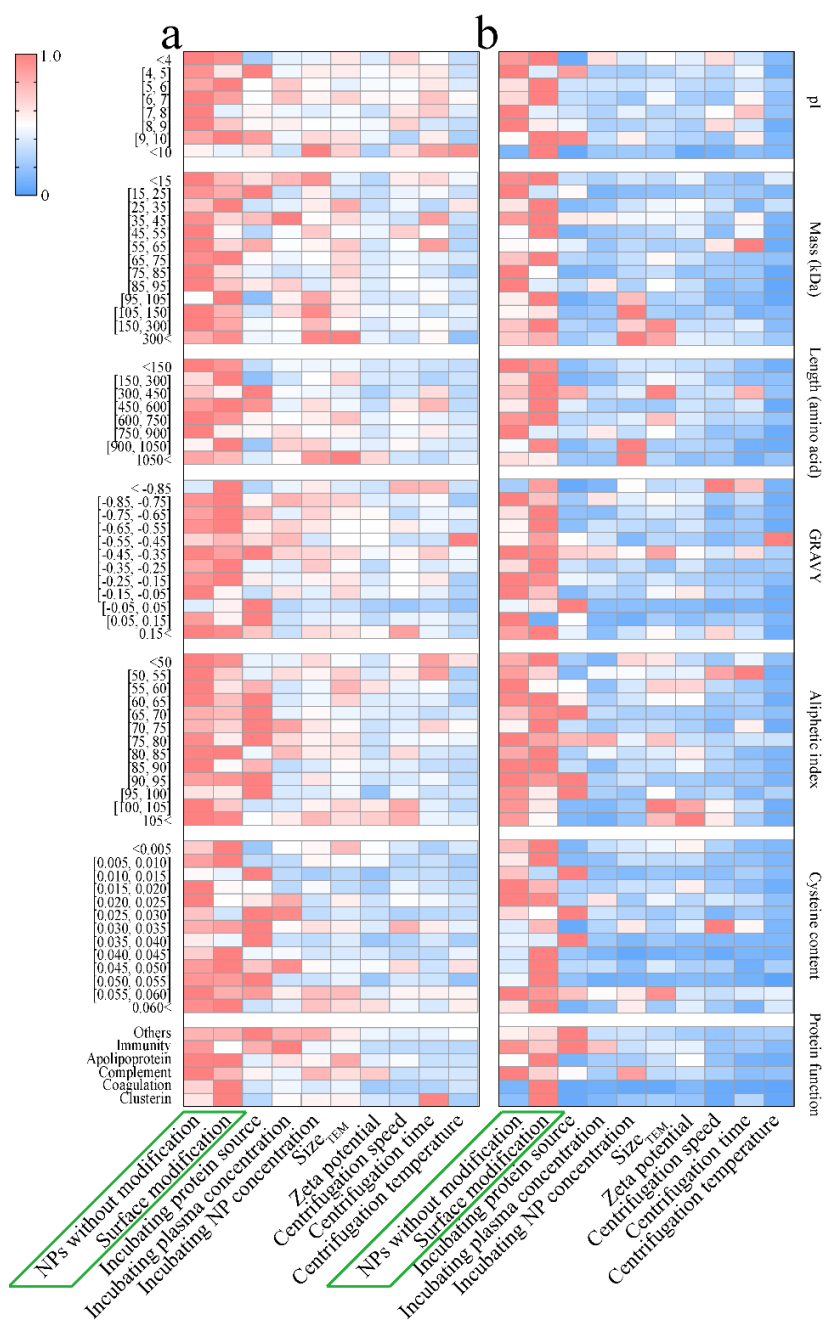

Figure S6. Variable importance of the physicochemical and functional composition prediction models. The normalized percentage of the increase in mean square error (a) and the normalized increase in node purity (b) were employed to measure the variable importance.



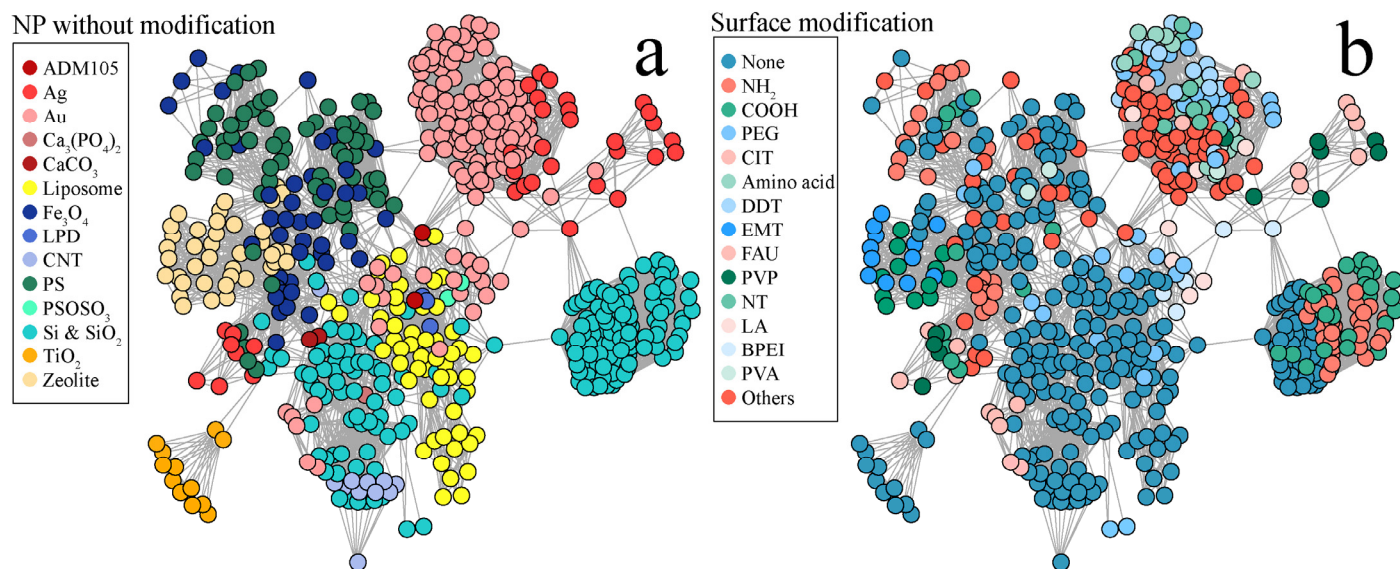

Figure S7. Heterogeneity distribution of priority factors from clusterin composition prediction models visualized by a similarity network. Each node represents a data piece in the functional composition models. The nodes are colored according to the priority factors, NP without modification (a) and surface modification (b). In the well-performed RF models, the connected nodes are more than four times the average in each proximity matrix. Tight connections in each cluster indicate the high homogeneity of nodes for the factor-response dependence learned by the RF models. The sparse connections represent the heterogeneity of nodes in terms of NP properties and experimental conditions in the cluster. The full forms of the abbreviations are listed in Table S1.

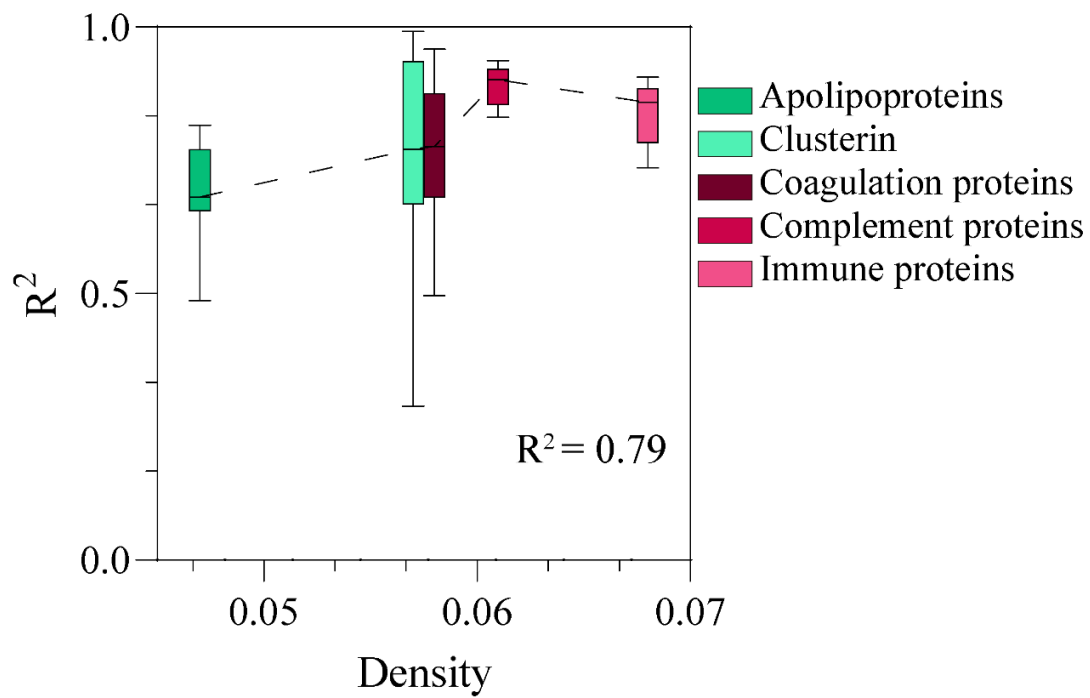

Figure S8. Relationship between the network density and model performance. A tenfold cross-validation was utilized to measure the model performance. The correlation coefficient ( $R^2$ ) was applied to assess the relationship between the cluster density of the network and the model performance (average  $R^2$ ).

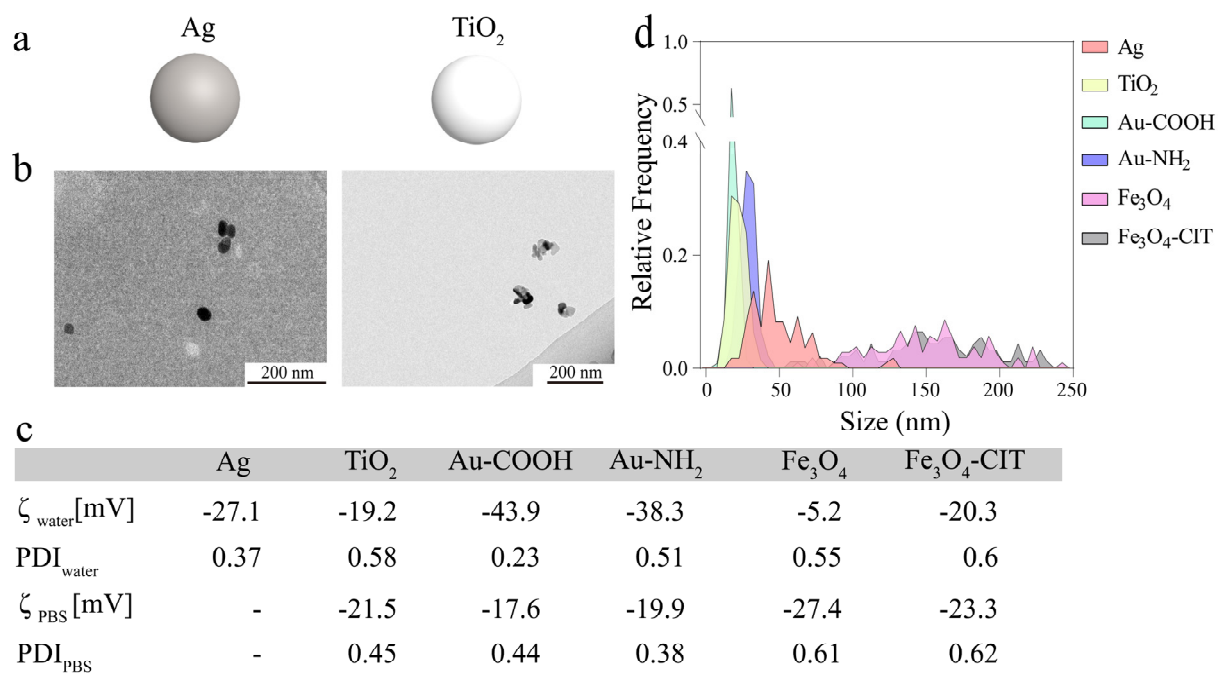

Figure S9. Physicochemical characterization of the tested NPs. a, Ag and TiO<sub>2</sub> NPs with no surface modifications; b, TEM micrograph showing the morphologies and sizes of Ag and TiO<sub>2</sub> NPs; c, physicochemical characterization of NPs dispersed in water and phosphate-buffered saline (PBS); d, size distribution measured by TEM.  $\zeta_{\text{water/PBS}}$ , zeta potential of NP dispersion in water or PBS; PDI, polydispersity index.

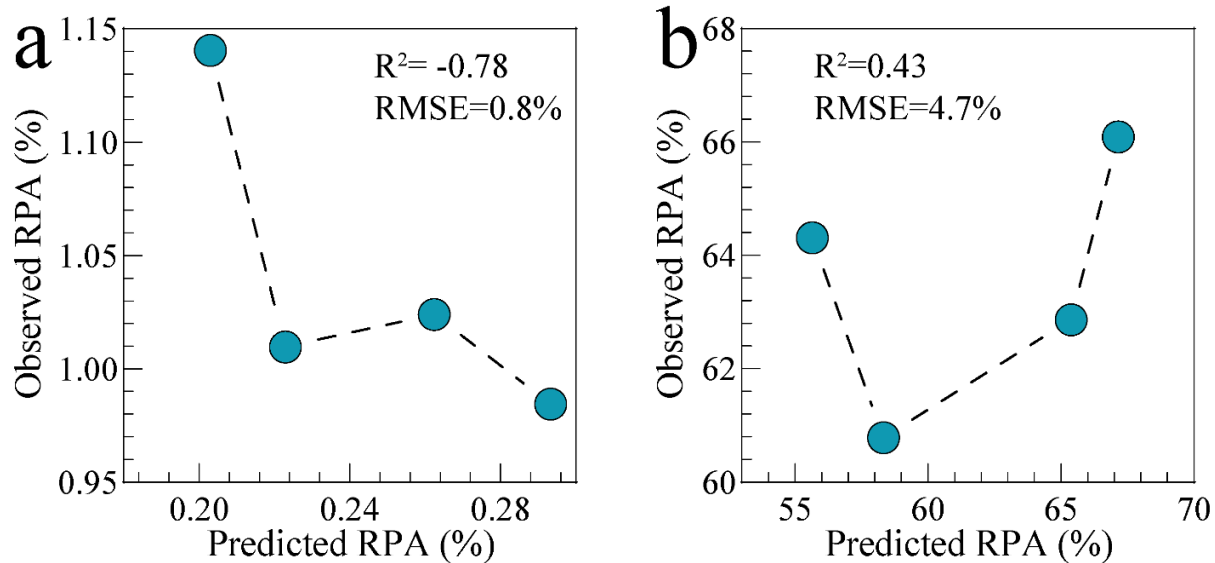

Figure S10. Experiments evaluating the predictions of functional and physicochemical compositions of protein coronas. The observed functional components of the protein coronas on four NPs ( $\text{Fe}_3\text{O}_4$ ,  $\text{Fe}_3\text{O}_4\text{-CIT}$ ,  $\text{Au-COOH}$ , and  $\text{Au-NH}_2$ ) were measured by LC-MS/MS. The model prediction accuracy was measured by the correlation coefficient ( $R^2$ ) and root-mean-square error (RMSE) between observations and predictions for clusterin (a) and other protein (b) compositions of selected NPs.

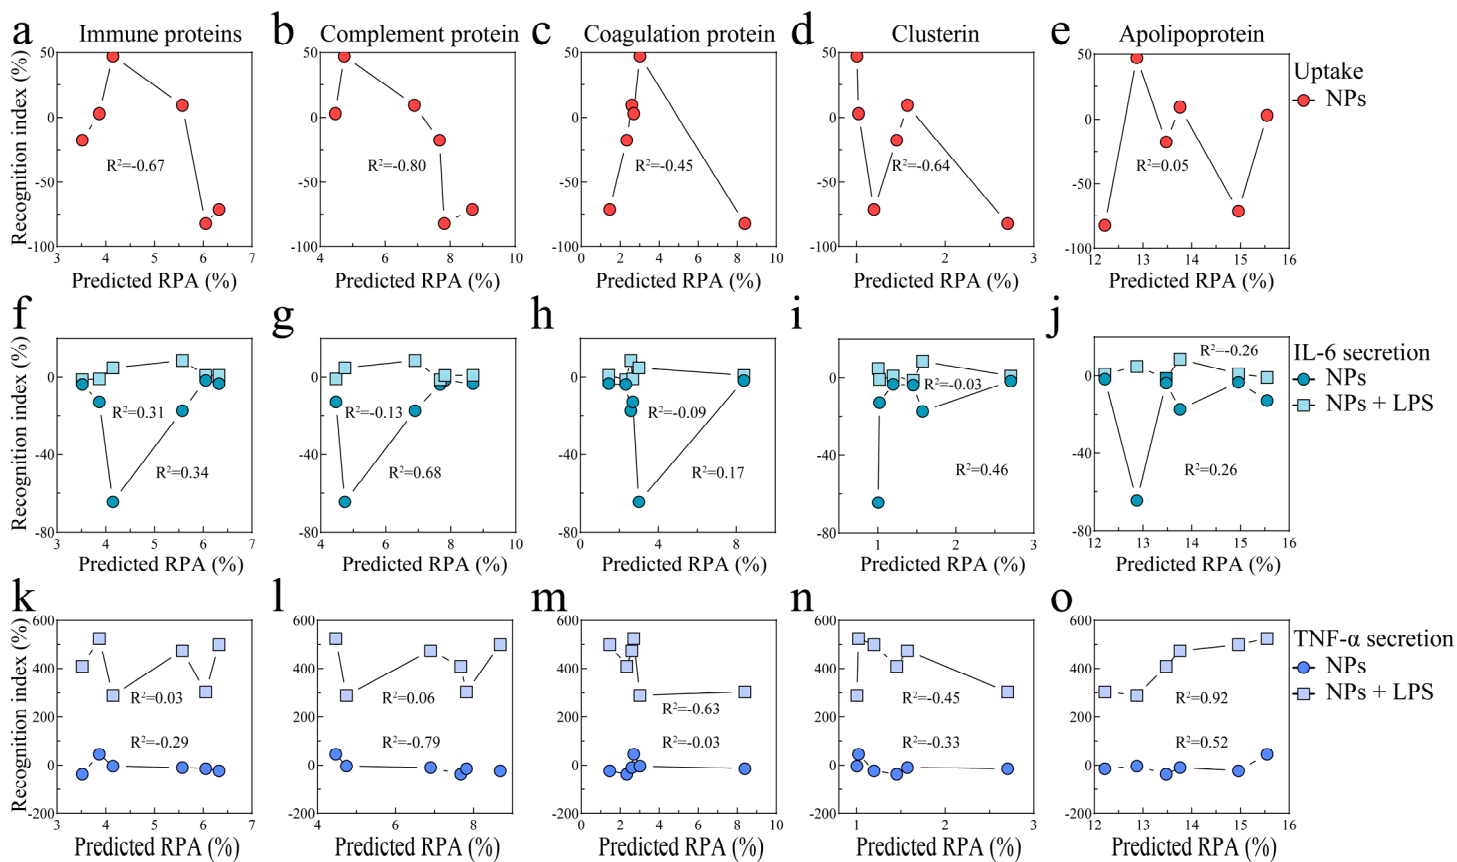

Figure S11. Uptake of NPs and immune responses of macrophages mediated by the protein corona. a-e, Uptake of NPs in macrophages (RAW264.7). Macrophages were treated with NPs ( $\text{Fe}_3\text{O}_4$ ,  $\text{Fe}_3\text{O}_4$ -CIT, Au-COOH, Au-NH<sub>2</sub>, TiO<sub>2</sub>, and Ag NPs) with or without a protein corona at a concentration of 50 mg/L in serum-free medium for 4 h. f-j or k-o, IL-6 or TNF- $\alpha$  generated from macrophages treated with 25 mg/L NPs ( $\text{Fe}_3\text{O}_4$ ,  $\text{Fe}_3\text{O}_4$ -CIT, Au-COOH, Au-NH<sub>2</sub>, TiO<sub>2</sub>, and Ag NPs) with or without a protein corona in serum-free medium for 6 h. Macrophages were treated with LPS for 6 h after NP exposure as a positive control. Relationships in the recognition index (defined in Methods) due to the presence of a corona, with the five functional components (apolipoprotein, complement protein, coagulation protein, immune protein and clusterin) of the

protein corona predicted by functional prediction models, as measured by the correlation coefficient ( $R^2$ ).

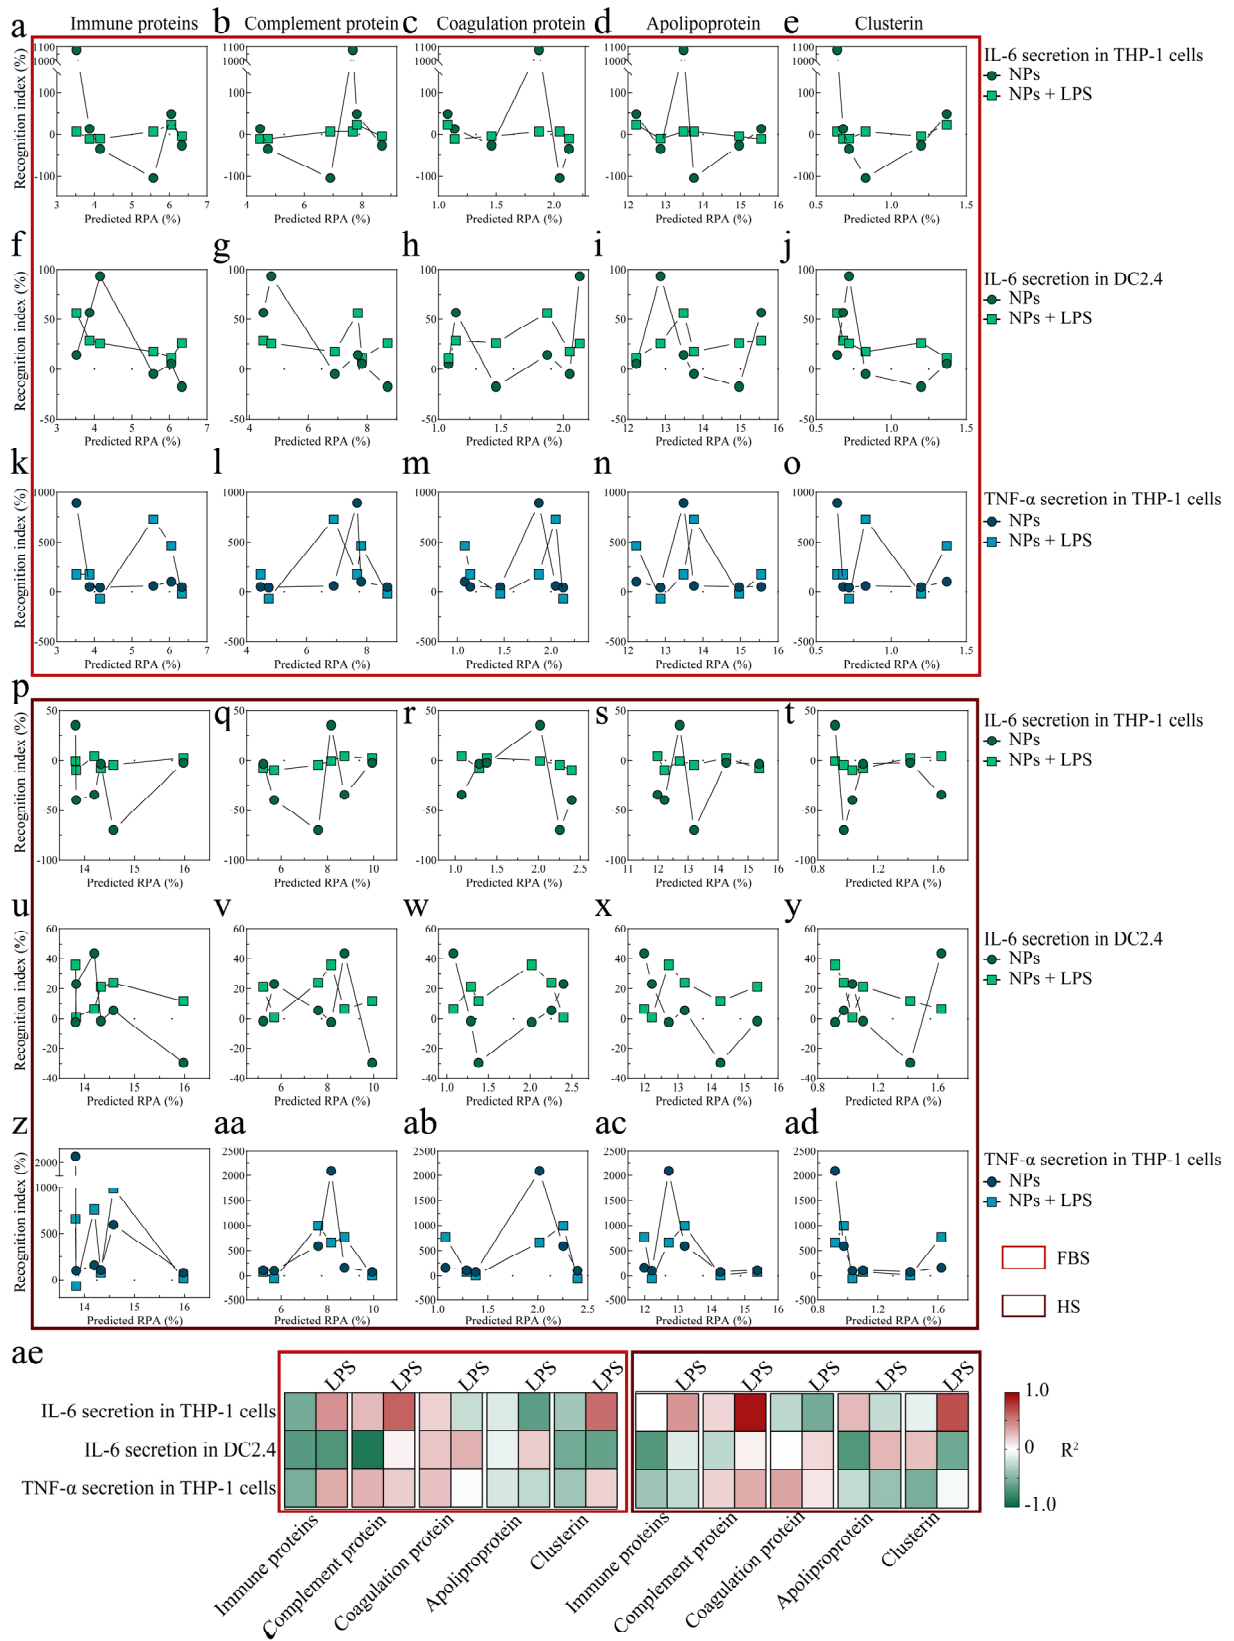

Figure S12. Immune responses of THP-1 and DC2.4 cells mediated by the protein corona. Protein coronas were formed in fetal bovine serum (FBS in panels a-o) or human serum (HS in panels p-ad). The expression of IL-6 (a-j and p-y) or TNF- $\alpha$  (k-o and z-ad) was detected in THP-1 (a-e, k-t and z-ad) or DC2.4 (f-j and u-y) cells treated with 25 mg/L NPs ( $\text{Fe}_3\text{O}_4$ ,  $\text{Fe}_3\text{O}_4$ -CIT, Au-COOH, Au-NH<sub>2</sub>, TiO<sub>2</sub>, and Ag NPs) for 6 h. Cells were treated with LPS for 6 h after NPs exposure as a positive control. Relationships between the recognition index (defined in the method section) and the functional components (apolipoprotein, complement protein, coagulation protein, immune protein and clusterin) of the protein corona predicted by functional prediction models, were measured by the correlation coefficient ( $R^2$ ), as shown in panel ae.



Table S1. Classes of NP modifications.

| Original modification  | Transformed modification | Full name                                                                             | Class    |
|------------------------|--------------------------|---------------------------------------------------------------------------------------|----------|
| AC                     | AC                       | N-Acetyl-L-cysteine                                                                   | Anionic  |
| AHT                    | AHT                      | 6-Amino-1-hexanethiol                                                                 | Cationic |
| Ala-SH                 | Amino acid               | Thiolated L-alanine                                                                   | Anionic  |
| Asn-SH                 | Amino acid               | Thiolated L-asparagine                                                                | Anionic  |
| AUT                    | AUT                      | 11-Amino-1-undecanethiol                                                              | Cationic |
| BCN                    | BCN                      | Bicyclononyne                                                                         | Neutral  |
| BPEI                   | BPEI                     | Branched polyethyleneimine                                                            | Neutral  |
| CA                     | CA                       | Citric acid                                                                           | Anionic  |
| CALNN                  | CALNN                    | Peptide sequence 'CALNN'                                                              | Anionic  |
| CFGAILS                | CFGAILS                  | Peptide sequence 'CFGAILS'                                                            | Anionic  |
| COOH                   | COOH                     | Carboxyl                                                                              | Anionic  |
| cPEG <sub>5K</sub> -SH | PEG                      | Carboxymethyl-poly(ethylene glycol)-thiol(5kDa)                                       | Neutral  |
| CTAB                   | CTAB                     | Hexadecyltrimethylammonium bromide                                                    | Cationic |
| CVVIT                  | CVVIT                    | Peptide sequence 'CVVIT'                                                              | Anionic  |
| DDT@BDHDA              | DDT                      | 1-Dodecanethiol @<br>benzyltrimethylhexadecylammonium bromide                         | Cationic |
| DDT@CTAB               | DDT                      | 1-Dodecanethiol @ hexadecyltrimethylammonium<br>bromide                               | Cationic |
| DDT@DOTAP              | DDT                      | 1-Dodecanethiol @<br>1,2-dioleoyl-3-trimethylammonium-propane                         | Cationic |
| DDT@HDA                | DDT                      | 1-Dodecanethiol @ hexadecylamine                                                      | Cationic |
| DDT@ODA                | DDT                      | 1-Dodecanethiol @ octadecylamine                                                      | Cationic |
| DDT@SA                 | DDT                      | 1-Dodecanethiol @ stearic acid                                                        | Anionic  |
| DDT@SDS                | DDT                      | 1-Dodecanethiol @ sodium dodecyl sulfate                                              | Anionic  |
| DTNB                   | DTNB                     | 5,5'-Dithiobis (2-nitrobenzoic acid)                                                  | Anionic  |
| EMT                    | EMT                      | Na <sub>88</sub> (AlO <sub>2</sub> ) <sub>88</sub> (SiO <sub>2</sub> ) <sub>104</sub> | Neutral  |
| F127                   | F127                     | Pluronic F-127                                                                        | Anionic  |
| FAU                    | FAU                      | Na <sub>73</sub> (AlO <sub>2</sub> ) <sub>73</sub> (SiO <sub>2</sub> ) <sub>119</sub> | Neutral  |
| Gly-SH                 | Amino acid               | Thiolated L-glycine                                                                   | Anionic  |
| Gold                   | None                     | Gold                                                                                  | Neutral  |
| CIT                    | CIT                      | Citrate                                                                               | Anionic  |
| HDA                    | HDA                      | Hexadecylamine                                                                        | Cationic |
| LA                     | LA                       | $\alpha$ -Lipoic acid                                                                 | Anionic  |
| MAA                    | MAA                      | Mercaptoacetic acid                                                                   | Anionic  |
| MBA                    | MBA                      | 4-Mercaptobenzoic acid                                                                | Anionic  |
| MES                    | MES                      | 2-Mercaptoethanesulfonate                                                             | Anionic  |
| Met-SH                 | Amino acid               | Thiolated L-methionine                                                                | Anionic  |
| MHA                    | MHA                      | 6-Mercaptohexanoic acid                                                               | Anionic  |
| MHDA                   | MHDA                     | 16-Mercaptohexadecanoic acid                                                          | Anionic  |
| MPA                    | MPA                      | 3-Mercaptopropionic acid                                                              | Anionic  |
| mPEG <sub>1K</sub> -SH | PEG                      | Methoxy-poly(ethylene glycol)-thiol (1kDa)                                            | Neutral  |

|                                          |                  |                                                                                       |          |
|------------------------------------------|------------------|---------------------------------------------------------------------------------------|----------|
| mPEG <sub>20K</sub> -SH                  | PEG              | Methoxy-poly(ethylene glycol)-thiol (20kDa)                                           | Neutral  |
| mPEG <sub>2K</sub> -SH                   | PEG              | Methoxy-poly(ethylene glycol)-thiol (20kDa) (low density)                             | Neutral  |
| mPEG <sub>5K</sub>                       | PEG              | Methoxy-poly(ethylene glycol)-thiol (2kDa)                                            | Neutral  |
| mPEG <sub>5K</sub> (NH <sub>2</sub> )-SH | PEG              | Methoxy-poly(ethylene glycol)-thiol (5kDa)                                            | Neutral  |
| mPEG <sub>5K</sub> -SH                   | PEG              | Thiolated amino-poly(ethylene glycol) (methoxy-terminated) (5kDa)                     | Neutral  |
| MSA                                      | MSA              | Mercaptosuccinic acid                                                                 | Anionic  |
| MUA                                      | MUA              | 11-Mercaptoundecanoic acid                                                            | Anionic  |
| MUEG4                                    | MUEG4            | (11-Mercaptoundecyl)tetra(ethylene glycol)                                            | Neutral  |
| MUTA                                     | MUTA             | (11-Mercaptoundecyl)-N,N,N-trimethylammonium                                          | Cationic |
| NH <sub>2</sub>                          | NH <sub>2</sub>  | Amino                                                                                 | Cationic |
| None                                     | None             | None                                                                                  | Neutral  |
| nPEG <sub>5K</sub> -SH                   | PEG              | Amino-poly(ethylene glycol)-thiol (5kDa)                                              | Neutral  |
| NT@DCA                                   | NT               | 2-Napthalenethiol @ deoxycholic acid                                                  | Neutral  |
| NT@F127                                  | NT               | 2-Napthalenethiol @ Pluronic F-127                                                    | Anionic  |
| NT@PSMA-AAP                              | NT               | 2-Napthalenethiol @ (4'-aminoacetophenone)-modified poly(styrene-co-maleic anhydride) | Neutral  |
| NT@PSMA-AP                               | NT               | 2-Napthalenethiol @ aminopropanol-modified poly(styrene-co-maleic anhydride)          | Anionic  |
| NT@PSMA-EA                               | NT               | 2-Napthalenethiol @ ethanolamine-modified poly(styrene-co-maleic anhydride)           | Anionic  |
| NT@PSMA-EDA                              | NT               | 2-Napthalenethiol @ ethylenediamine-modified poly(styrene-co-maleic anhydride)        | Anionic  |
| NT@PSMA-Urea                             | NT               | 2-Napthalenethiol @ urea-modified poly(styrene-co-maleic anhydride)                   | Anionic  |
| NT@PVA                                   | NT               | 2-Napthalenethiol @ poly(vinyl alcohol)                                               | Anionic  |
| OAOA                                     | OAOA             | Oleic acid double layer                                                               | Anionic  |
| ODA                                      | ODA              | Octadecylamine                                                                        | Neutral  |
| OSO <sub>3</sub>                         | OSO <sub>3</sub> | Sulpho                                                                                | Anionic  |
| P80                                      | None             | Polysorbate 80                                                                        | Neutral  |
| PAH-SH                                   | PAH-SH           | Thiolated poly(allylamine)                                                            | Cationic |
| PC                                       | PC               | Phosphatidylcholine                                                                   | Neutral  |
| pDNA                                     | pDNA             | Plasmid deoxyribonucleic acid                                                         | Anionic  |
| PEEP <sub>49</sub>                       | PEEP             | Poly(ethyl ethylene phosphate) <sub>49</sub>                                          | Neutral  |
| PEEP <sub>92</sub>                       | PEEP             | Poly(ethyl ethylene phosphate) <sub>92</sub>                                          | Neutral  |
| PEG                                      | PEG              | Polyethylene glycol                                                                   | Neutral  |
| PEG <sub>3K</sub> (NH <sub>2</sub> )-SH  | PEG              | Thiolated amino-poly(ethylene glycol) (3kDa)                                          | Neutral  |
| PEI-SH                                   | PEI-SH           | Thiolated poly(ethyleneimine)                                                         | Cationic |
| Phe                                      | Amino acid       | L-Phenylalanine                                                                       | Anionic  |
| Phe-SH                                   | Amino acid       | Thiolated L-phenylalanine                                                             | Anionic  |
| PLL-SH                                   | Amino acid       | Thiolated poly(L-lysine)                                                              | Cationic |
| PVA                                      | PVA              | Poly(vinyl alcohol)                                                                   | Anionic  |
| PVA (COOH)                               | PVA              | Poly(vinyl alcohol)                                                                   | Anionic  |

|                           |                  |                                       |         |
|---------------------------|------------------|---------------------------------------|---------|
| PVA (NH <sub>2</sub> )    | PVA              | Poly(vinyl alcohol)                   | Anionic |
| PVA (NH <sub>2</sub> /OH) | PVA              | Poly(vinyl alcohol)                   | Anionic |
| PVA (OH)                  | PVA              | Poly(vinyl alcohol)                   | Anionic |
| PVP                       | PVP              | Poly(vinylpyrrolidone)                | Anionic |
| SA                        | SA               | Stearic acid                          | Anionic |
| Ser-SH                    | Amino acid       | Thiolated L-serine                    | Anionic |
| SiO <sub>2</sub>          | SiO <sub>2</sub> | Silicon dioxide                       | Neutral |
| SiO <sub>2</sub> (APTES)  | SiO <sub>2</sub> | Silicon dioxide                       | Neutral |
| SiO <sub>2</sub> (TEOS)   | SiO <sub>2</sub> | Silicon dioxide                       | Neutral |
| SPP                       | SPP              | Bis(p-sulfonatophenyl)phenylphosphine | Anionic |
| T20                       | T20              | TWEEN20                               | Anionic |
| Thr-SH                    | Amino acid       | Thiolated L-threonine                 | Anionic |
| TiO <sub>2</sub>          | TiO <sub>2</sub> | Titanium dioxide                      | Neutral |
| TP                        | TP               | N-(2-Mercaptopropionyl)glycine        | Anionic |
| Trp-SH                    | Amino acid       | Thiolated L-tryptophan                | Anionic |

## References

- Schöttler, S.; Becker, G.; Winzen, S.; Steinbach, T.; Mohr, K.; Landfester, K.; Mailänder, V.; Wurm, F. R., Protein adsorption is required for stealth effect of poly(ethylene glycol)- and poly(phosphoester)-coated nanocarriers. *Nat. Nanotechnol.* **2016**, *11* (4), 372-377.
- Martíneznegro, M.; Caracciolo, G.; Palchetti, S.; Pozzi, D.; Capriotti, A. L.; Cavaliere, C.; Laganà, A.; Ortiz, M. C.; Benito, J. M.; García Fernández, J. M., Biophysics and protein corona analysis of Janus cyclodextrin-DNA nanocomplexes. Efficient cellular transfection on cancer cells. *Biochim. Biophys. Acta Gen. Subj.* **2017**, *1861* (7), 1737-1749.
- O'Connell, D. J.; Bombelli, F. B.; Pitek, A. S.; Monopoli, M. P.; Cahill, D. J.; Dawson, K. A., Characterization of the bionano interface and mapping extrinsic interactions of the corona of nanomaterials. *Nanoscale* **2015**, *7* (37), 15268-15276.
- Laurent, S.; Ng, E. P.; Thirifays, C.; Lakiss, L.; Goupil, G. M.; Mintova, S.; Burtea, C.; Oveisi, E.; Hébert, C.; De Vries, M.; Motazacker, M. M.; Rezaee, F.; Mahmoudi, M., Corona

protein composition and cytotoxicity evaluation of ultra-small zeolites synthesized from template free precursor suspensions. *Toxicol. Res.* **2013**, *2* (4), 270-279.

5. Capriotti, A. L.; Caracciolo, G.; Caruso, G.; Foglia, P.; Pozzi, D.; Samperi, R.; Laganà, A., Differential analysis of "protein corona" profile adsorbed onto different nonviral gene delivery systems. *Anal. Biochem.* **2011**, *419* (2), 180-189.

6. Capriotti, A. L.; Caracciolo, G.; Cavaliere, C.; Foglia, P.; Pozzi, D.; Samperi, R.; Laganà, A., Do plasma proteins distinguish between liposomes of varying charge density? *J. Proteomics* **2012**, *75* (6), 1924-1932.

7. Caracciolo, G.; Pozzi, D.; Capriotti, A. L.; Cavaliere, C.; Laganà, A., Effect of DOPE and cholesterol on the protein adsorption onto lipid nanoparticles. *J. Nanopart. Res.* **2013**, *15* (3), 1498.

8. Pozzi, D.; Colapicchioni, V.; Caracciolo, G.; Piovesana, S.; Capriotti, A. L.; Palchetti, S.; De Grossi, S.; Riccioli, A.; Amenitsch, H.; Laganà, A., Effect of polyethyleneglycol (PEG) chain length on the bio-nano- interactions between PEGylated lipid nanoparticles and biological fluids: From nanostructure to uptake in cancer cells. *Nanoscale* **2014**, *6* (5), 2782-2792.

9. De Paoli, S. H.; Diduch, L. L.; Tegegn, T. Z.; Orecna, M.; Strader, M. B.; Karnaukhova, E.; Bonevich, J. E.; Holada, K.; Simak, J., The effect of protein corona composition on the interaction of carbon nanotubes with human blood platelets. *Biomaterials* **2014**, *35* (24), 6182-6194.

10. Lesniak, A.; Fenaroli, F.; Monopoli, M. P.; Åberg, C.; Dawson, K. A.; Salvati, A., Effects of the presence or absence of a protein corona on silica nanoparticle uptake and impact on cells. *ACS Nano* **2012**, *6* (7), 5845-5857.

11. Huang, H.; Lai, W.; Cui, M.; Liang, L.; Lin, Y.; Fang, Q.; Liu, Y.; Xie, L., An evaluation of blood compatibility of silver nanoparticles. *Sci. Rep.* **2016**, *6*, 25518.
12. Lara, S.; Alnasser, F.; Polo, E.; Garry, D.; Lo Giudice, M. C.; Hristov, D. R.; Rocks, L.; Salvati, A.; Yan, Y.; Dawson, K. A., Identification of Receptor Binding to the Biomolecular Corona of Nanoparticles. *ACS Nano* **2017**, *11* (2), 1884-1893.
13. Lo Giudice, M. C.; Herda, L. M.; Polo, E.; Dawson, K. A., In situ characterization of nanoparticle biomolecular interactions in complex biological media by flow cytometry. *Nat. Commun.* **2016**, *7*, 13475.
14. Hadjidemetriou, M.; Al-Ahmady, Z.; Mazza, M.; Collins, R. F.; Dawson, K.; Kostarelos, K., *In vivo* biomolecule corona around blood-circulating, clinically used and antibody-targeted lipid bilayer nanoscale vesicles. *ACS Nano* **2015**, *9* (8), 8142-8156.
15. Amici, A.; Caracciolo, G.; Digiaco, L.; Gambini, V.; Marchini, C.; Tilio, M.; Capriotti, A. L.; Colapicchioni, V.; Matassa, R.; Familiari, G.; Palchetti, S.; Pozzi, D.; Mahmoudi, M.; Laganà, A., In vivo protein corona patterns of lipid nanoparticles. *RSC Adv.* **2017**, *7* (2), 1137-1145.
16. Palchetti, S.; Pozzi, D.; Capriotti, A. L.; Barbera, G. L.; Chiozzi, R. Z.; Digiaco, L.; Peruzzi, G.; Caracciolo, G.; Laganà, A., Influence of dynamic flow environment on nanoparticle-protein corona: From protein patterns to uptake in cancer cells. *Colloids Surf. B Biointerfaces* **2017**, *153*, 263-271.
17. Lai, W.; Wang, Q.; Li, L.; Hu, Z.; Chen, J.; Fang, Q., Interaction of gold and silver nanoparticles with human plasma: Analysis of protein corona reveals specific binding patterns. *Colloids Surf. B Biointerfaces* **2017**, *152*, 317-325.

18. Caracciolo, G.; Pozzi, D.; Capriotti, A. L.; Cavaliere, C.; Piovesana, S.; Amenitsch, H.; Lagana, A., Lipid composition: a "key factor" for the rational manipulation of the liposome-protein corona by liposome design. *RSC Adv.* **2015**, *5* (8), 5967-5975.
19. Caracciolo, G.; Pozzi, D.; Capriotti, A. L.; Cavaliere, C.; Piovesana, S.; La Barbera, G.; Amici, A.; Lagana, A., The liposome-protein corona in mice and humans and its implications for in vivo delivery. *J. Mater. Chem. B* **2014**, *2* (42), 7419-7428.
20. Bertoli, F.; Davies, G. L.; Monopoli, M. P.; Moloney, M.; Gun'Ko, Y. K.; Salvati, A.; Dawson, K. A., Magnetic nanoparticles to recover cellular organelles and study the time resolved nanoparticle-cell interactome throughout uptake. *Small* **2014**, *10* (16), 3307-3315.
21. Liu, Z.; Zhan, X.; Yang, M.; Yang, Q.; Xu, X.; Lan, F.; Wu, Y.; Gu, Z., A magnetic-dependent protein corona of tailor-made superparamagnetic iron oxides alters their biological behaviors. *Nanoscale* **2016**, *8* (14), 7544-7555.
22. Kelly, P. M.; Åberg, C.; Polo, E.; O'Connell, A.; Cookman, J.; Fallon, J.; Krpetić, Ž.; Dawson, K. A., Mapping protein binding sites on the biomolecular corona of nanoparticles. *Nat. Nanotechnol.* **2015**, *10* (5), 472-479.
23. Tenzer, S.; Docter, D.; Rosfa, S.; Wlodarski, A.; Kuharev, J.; Rekić, A.; Knauer, S. K.; Bantz, C.; Nawroth, T.; Bier, C.; Sirirattanapan, J.; Mann, W.; Treuel, L.; Zellner, R.; Maskos, M.; Schild, H.; Stauber, R. H., Nanoparticle size is a critical physicochemical determinant of the human blood plasma corona: A comprehensive quantitative proteomic analysis. *ACS Nano* **2011**, *5* (9), 7155-7167.
24. Hu, Z.; Zhang, H.; Zhang, Y.; Wu, R.; Zou, H., Nanoparticle size matters in the formation of plasma protein coronas on Fe<sub>3</sub>O<sub>4</sub> nanoparticles. *Colloids Surf. B Biointerfaces* **2014**, *121*, 354-361.

25. Palchetti, S.; Digiaco, L.; Pozzi, D.; Peruzzi, G.; Micarelli, E.; Mahmoudi, M.; Caracciolo, G., Nanoparticles-cell association predicted by protein corona fingerprints. *Nanoscale* **2016**, *8* (25), 12755-12763.
26. Hu, Z.; Zhao, L.; Zhang, H.; Zhang, Y.; Wu, R.; Zou, H., The on-bead digestion of protein corona on nanoparticles by trypsin immobilized on the magnetic nanoparticle. *J. Chromatogr. A* **2014**, *1334*, 55-63.
27. Groult, H.; Ruiz-Cabello, J.; Lechuga-Vieco, A. V.; Mateo, J.; Benito, M.; Bilbao, I.; Martínez-Alcázar, M. P.; Lopez, J. A.; Vázquez, J.; Herranz, F. F., Phosphatidylcholine-coated iron oxide nanomicelles for *in vivo* prolonged circulation time with an antibiofouling protein corona. *Chem. - Eur. J.* **2014**, *20* (50), 16662-16671.
28. Monopoli, M. P.; Walczyk, D.; Campbell, A.; Elia, G.; Lynch, I.; Baldelli Bombelli, F.; Dawson, K. A., Physical-Chemical aspects of protein corona: Relevance to *in vitro* and *in vivo* biological impacts of nanoparticles. *J. Am. Chem. Soc.* **2011**, *133* (8), 2525-2534.
29. Clemments, A. M.; Botella, P.; Landry, C. C., Protein adsorption from biofluids on silica nanoparticles: Corona analysis as a function of particle diameter and porosity. *ACS Appl. Mater. Interfaces* **2015**, *7* (39), 21682-21689.
30. Walkey, C. D.; Olsen, J. B.; Song, F.; Liu, R.; Guo, H.; Olsen, D. W. H.; Cohen, Y.; Emili, A.; Chan, W. C. W., Protein corona fingerprinting predicts the cellular interaction of gold and silver nanoparticles. *ACS Nano* **2014**, *8* (3), 2439-2455.
31. Mirshafiee, V.; Mahmoudi, M.; Lou, K.; Cheng, J.; Kraft, M. L., Protein corona significantly reduces active targeting yield. *Chem. Commun.* **2013**, *49* (25), 2557-2559.

32. Schöttler, S.; Klein, K.; Landfester, K.; Mailänder, V., Protein source and choice of anticoagulant decisively affect nanoparticle protein corona and cellular uptake. *Nanoscale* **2016**, *8* (10), 5526-5536.
33. Vogt, C.; Pernemalm, M.; Kohonen, P.; Laurent, S.; Hultenby, K.; Vahter, M.; Lehtiö, J.; Toprak, M. S.; Fadeel, B., Proteomics analysis reveals distinct corona composition on magnetic nanoparticles with different surface coatings: Implications for interactions with primary human macrophages. *PLoS One* **2015**, *10* (10), e0129008.
34. Pozzi, D.; Caracciolo, G.; Capriotti, A. L.; Cavaliere, C.; Piovesana, S.; Colapicchioni, V.; Palchetti, S.; Riccioli, A.; Laganà, A., A proteomics-based methodology to investigate the protein corona effect for targeted drug delivery. *Mol. Biosyst.* **2014**, *10* (11), 2815-2819.
35. Tenzer, S.; Docter, D.; Kuharev, J.; Musyanovych, A.; Fetz, V.; Hecht, R.; Schlenk, F.; Fischer, D.; Kiouptsi, K.; Reinhardt, C.; Landfester, K.; Schild, H.; Maskos, M.; Knauer, S. K.; Stauber, R. H., Rapid formation of plasma protein corona critically affects nanoparticle pathophysiology. *Nat. Nanotechnol.* **2013**, *8* (10), 772-781.
36. Albanese, A.; Walkey, C. D.; Olsen, J. B.; Guo, H.; Emili, A.; Chan, W. C. W., Secreted biomolecules alter the biological identity and cellular interactions of nanoparticles. *ACS Nano* **2014**, *8* (6), 5515-5526.
37. Caracciolo, G.; Cardarelli, F.; Pozzi, D.; Salomone, F.; Maccari, G.; Bardi, G.; Capriotti, A. L.; Cavaliere, C.; Papi, M.; Laganà, A., Selective targeting capability acquired with a protein corona adsorbed on the surface of 1,2-dioleoyl-3-trimethylammonium propane/dna nanoparticles. *ACS Appl. Mater. Interfaces* **2013**, *5* (24), 13171-13179.
38. Sakulku, U.; Mahmoudi, M.; Maurizi, L.; Coullerez, G.; Hofmann-Antenbrink, M.; Vries, M.; Motazacker, M.; Rezaee, F.; Hofmann, H., Significance of surface charge and shell material



- of superparamagnetic iron oxide nanoparticle (SPION) based core/shell nanoparticles on the composition of the protein corona. *Biomater. Sci.* **2015**, *3* (2), 265-278.
39. Shannahan, J. H.; Lai, X.; Ke, P. C.; Podila, R.; Brown, J. M.; Witzmann, F. A., Silver nanoparticle protein corona composition in cell culture media. *PLoS One* **2013**, *8* (9), e74001.
40. Mahmoudi, M.; Shokrgozar, M. A.; Behzadi, S., Slight temperature changes affect protein affinity and cellular uptake/toxicity of nanoparticles. *Nanoscale* **2013**, *5* (8), 3240-3244.
41. Pisani, C.; Rascol, E.; Dorandeu, C.; Gaillard, J. C.; Charnay, C.; Guari, Y.; Chopineau, J.; Armengaud, J.; Devoisselle, J. M.; Prat, O., The species origin of the serum in the culture medium influences the in vitro toxicity of silica nanoparticles to HepG2 cells. *PLoS One* **2017**, *12* (8), e0182906.
42. Caracciolo, G.; Palchetti, S.; Colapicchioni, V.; Digiacomo, L.; Pozzi, D.; Capriotti, A. L.; La Barbera, G.; Laganà, A., Stealth effect of biomolecular corona on nanoparticle uptake by immune cells. *Langmuir* **2015**, *31* (39), 10764-10773.
43. Wu, C.-Y.; Young, D.; Martel, J.; Young, J. D., A story told by a single nanoparticle in the body fluid: demonstration of dissolution-reprecipitation of nanocrystals in a biological system. *Nanomedicine* **2015**, *10* (17), 2659-2676.
44. Pozzi, D.; Caracciolo, G.; Capriotti, A. L.; Cavaliere, C.; La Barbera, G.; Anchordoquy, T. J.; Laganà, A., Surface chemistry and serum type both determine the nanoparticle-protein corona. *J. Proteomics* **2015**, *119*, 209-217.
45. Chandran, P.; Riviere, J. E.; Monteiro-Riviere, N. A., Surface chemistry of gold nanoparticles determines the biocorona composition impacting cellular uptake, toxicity and gene expression profiles in human endothelial cells. *Nanotoxicology* **2017**, *11* (4), 507-519.

46. Jedlovszky-Hajdú, A.; Bombelli, F. B.; Monopoli, M. P.; Tombácz, E.; Dawson, K. A., Surface coatings shape the protein corona of SPIONs with relevance to their application in vivo. *Langmuir* **2012**, *28* (42), 14983-14991.
47. Kuruvilla, J.; Farinha, A. P.; Bayat, N.; Cristobal, S., Surface proteomics on nanoparticles: a step to simplify the rapid prototyping of nanoparticles. *Nanoscale Horiz.* **2017**, *2* (1), 55-64.
48. Nissinen, T.; Näkki, S.; Laakso, H.; Kučiauskas, D.; Kaupinis, A.; Kettunen, M. I.; Liimatainen, T.; Hyvönen, M.; Valius, M.; Gröhn, O.; Lehto, V. P., Tailored dual pegylation of inorganic porous nanocarriers for extremely long blood circulation *in vivo*. *ACS Appl. Mater. Interfaces* **2016**, *8* (48), 32723-32731.
49. Barrán-Berdón, A. L.; Pozzi, D.; Caracciolo, G.; Capriotti, A. L.; Caruso, G.; Cavaliere, C.; Riccioli, A.; Palchetti, S.; Laganà, A., Time evolution of nanoparticle-protein corona in human plasma: Relevance for targeted drug delivery. *Langmuir* **2013**, *29* (21), 6485-6494.
50. Hadjidemetriou, M.; Al-Ahmady, Z.; Kostarelos, K., Time-evolution of in vivo protein corona onto blood-circulating PEGylated liposomal doxorubicin (DOXIL) nanoparticles. *Nanoscale* **2016**, *8* (13), 6948-6957.
51. Pisani, C.; Gaillard, J. C.; Odorico, M.; Nyalosaso, J. L.; Charnay, C.; Guari, Y.; Chopineau, J.; Devoisselle, J. M.; Armengaud, J.; Prat, O., The timeline of corona formation around silica nanocarriers highlights the role of the protein interactome. *Nanoscale* **2017**, *9* (5), 1840-1851.
52. Mahmoudi, M.; Lohse, S. E.; Murphy, C. J.; Fathizadeh, A.; Montazeri, A.; Suslick, K. S., Variation of protein corona composition of gold nanoparticles following plasmonic heating. *Nano Lett.* **2014**, *14* (1), 6-12.

53. Raghavendra, A. J.; Fritz, K.; Fu, S.; Brown, J. M.; Podila, R.; Shannahan, J. H., Variations in biocorona formation related to defects in the structure of single walled carbon nanotubes and the hyperlipidemic disease state. *Sci. Rep.* **2017**, *7* (1), 8382.
54. Kokkinopoulou, M.; Simon, J.; Landfester, K.; Mailänder, V.; Lieberwirth, I., Visualization of the protein corona: Towards a biomolecular understanding of nanoparticle-cell-interactions. *Nanoscale* **2017**, *9* (25), 8858-8870.
55. Rahimi, M.; Ng, E. P.; Bakhtiari, K.; Vinciguerra, M.; Ahmad, H. A.; Awala, H.; Mintova, S.; Daghighi, M.; Bakhshandeh Rostami, F.; De Vries, M.; Motazacker, M. M.; Peppelenbosch, M. P.; Mahmoudi, M.; Rezaee, F., Zeolite nanoparticles for selective sorption of plasma proteins. *Sci. Rep.* **2015**, *5*, 17259.
56. Garcíaalvarez, R.; Hadjidemetriou, M.; Sáncheziglesias, A.; Lizmarzan, L. M.; Kostarelos, K., *In vivo* formation of protein corona on gold nanoparticles: The effect of size and shape. *Nanoscale* **2017**, *10* (3), 1256-1264.
